# Supplementary material
Source: publisher site journal article supplement (https://www.dovepress.com/article/105651)
Supplement: Supplementary file 1 [file get_supplementary_file.php]

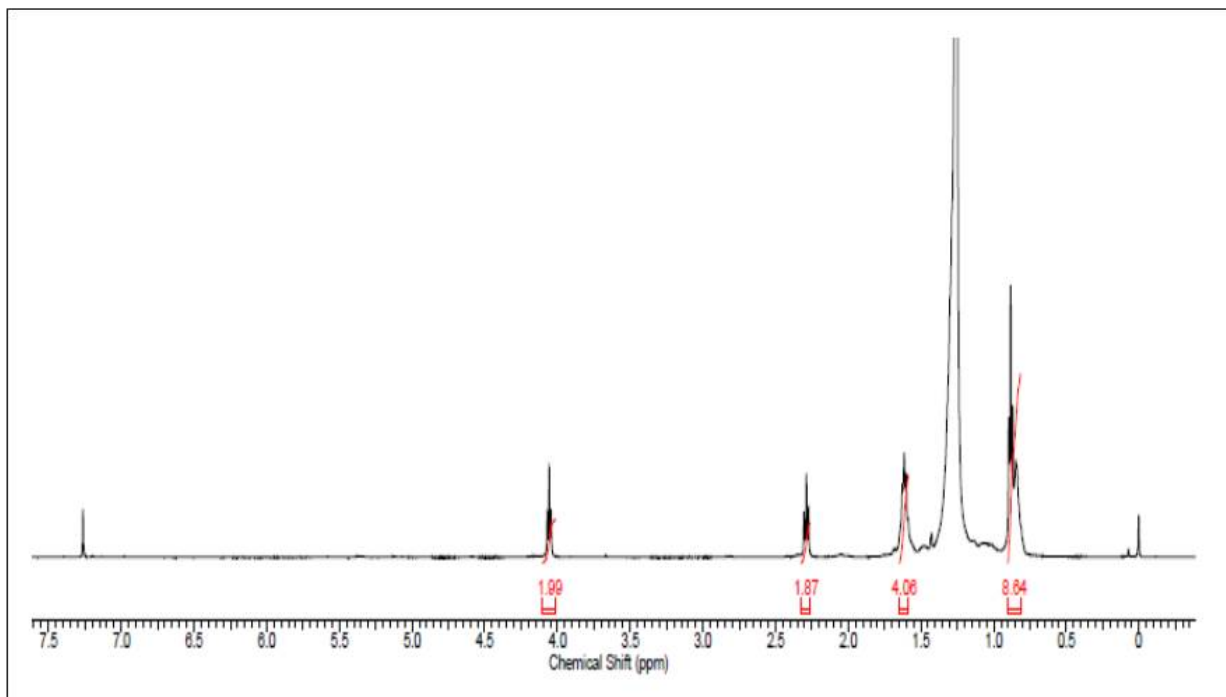

Supplementary Figure 1  $^1\text{H}$  NMR spectrum of ethyl 8-hydroxy-8-methyl-tridecanoate (1)

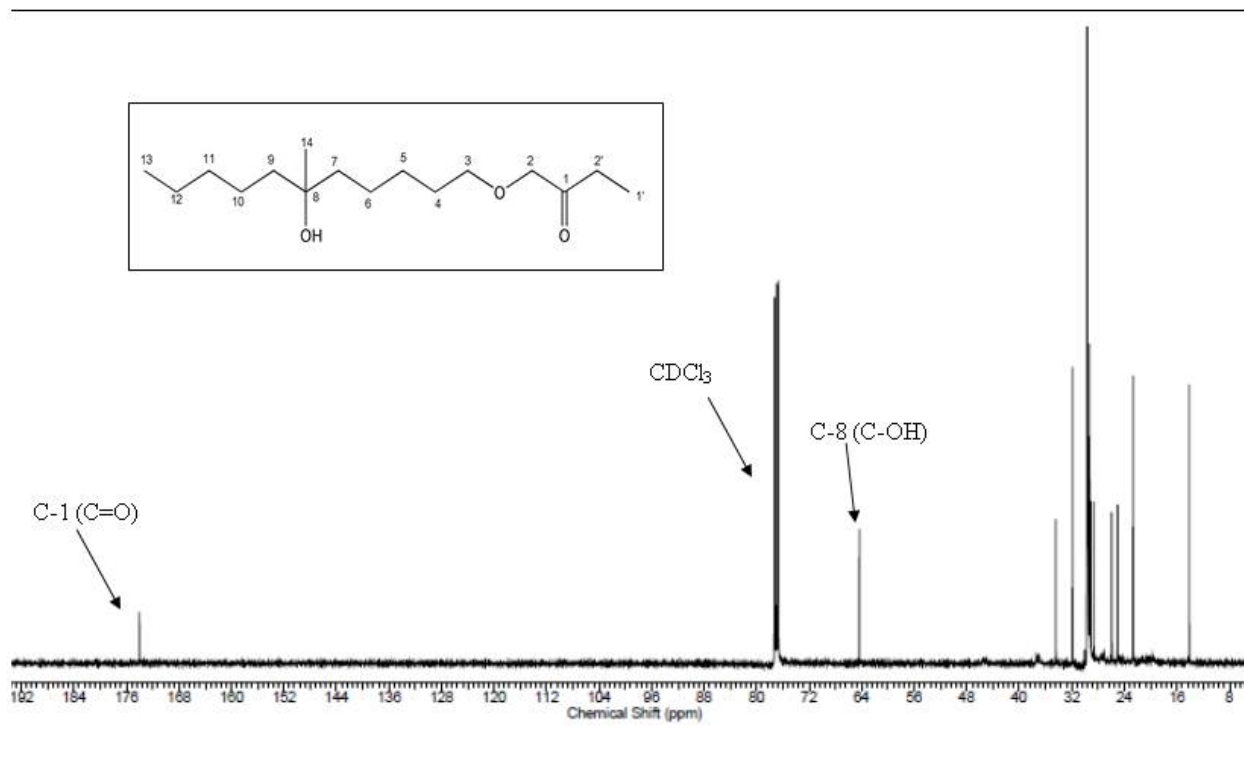

Supplementary Figure 2  $^{13}\text{C}$  NMR spectrum of ethyl 8-hydroxy-8-methyl-tridecanoate (1)
