# Supplementary material
Source: publisher site journal article supplement (https://www.dovepress.com/article/105651)
Supplement: Supplementary file 2 [file get_supplementary_file.php]

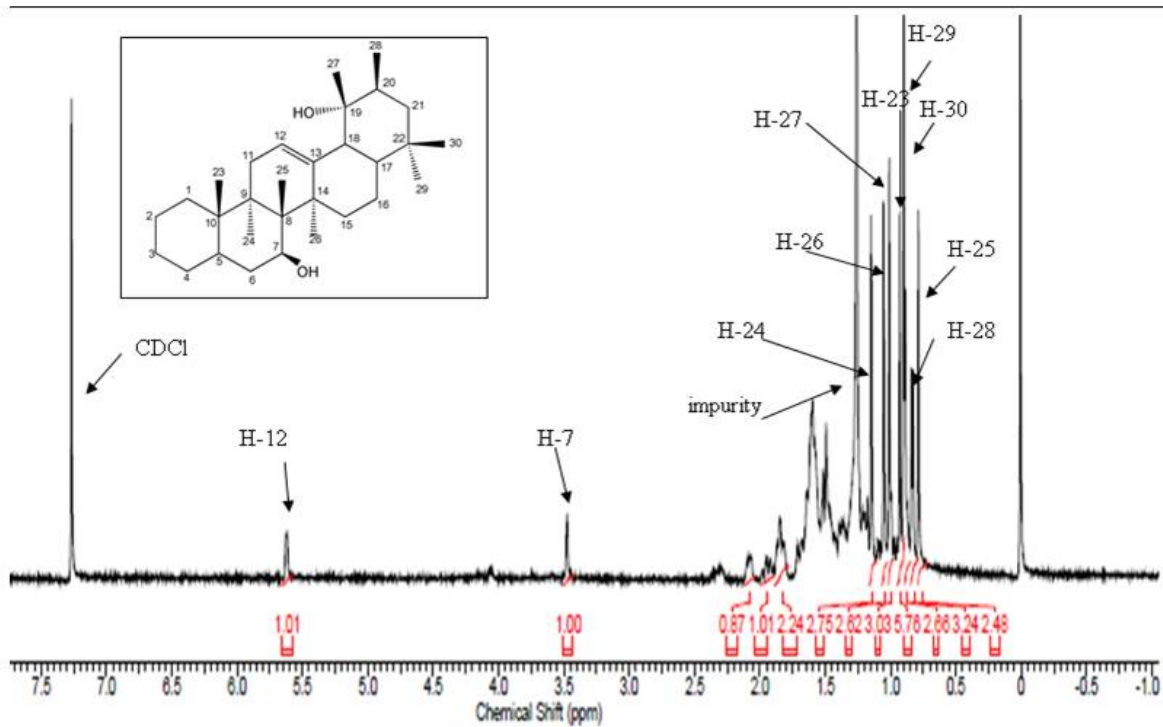

Supplementary Figure 3 <sup>1</sup>H NMR spectrum of 7β,19α dihydroxy-urs-12-ene (6)

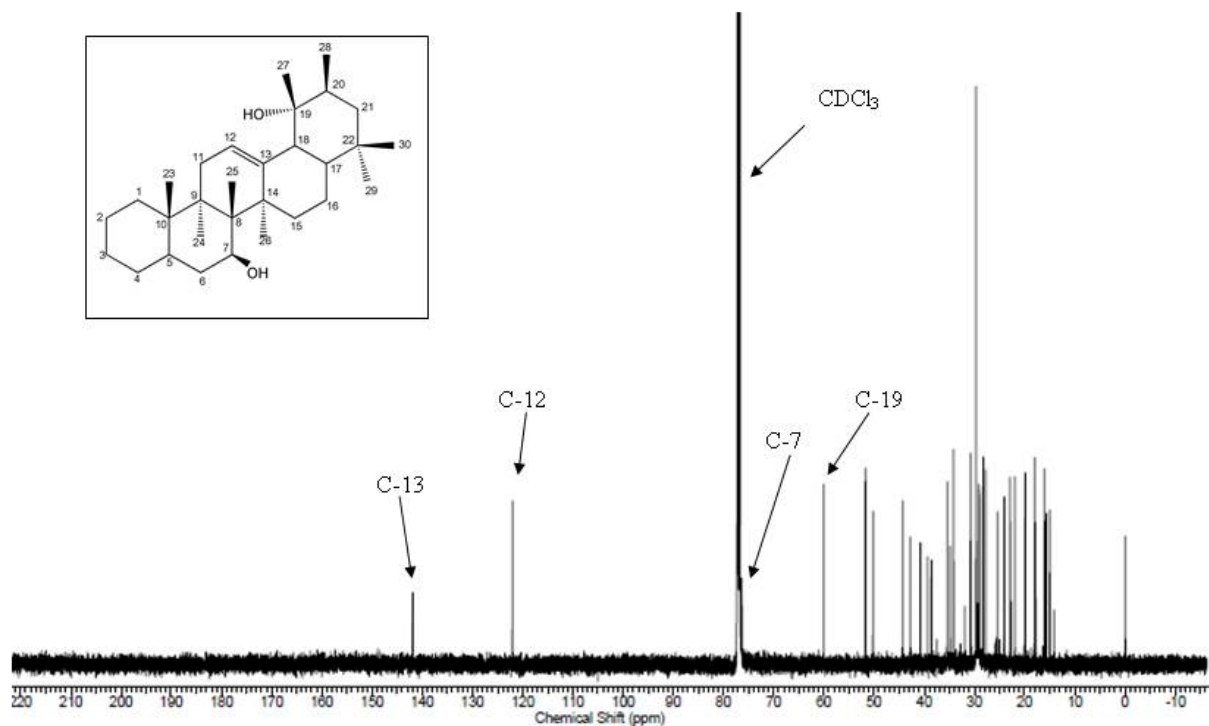

Supplementary Figure 4 <sup>13</sup>C NMR spectrum of 7β,19α dihydroxy-urs-12-ene (6)
