# Supplementary material
Source: publisher site journal article supplement (https://www.dovepress.com/article/105651)
Supplement: Supplementary file 3 [file get_supplementary_file.php]

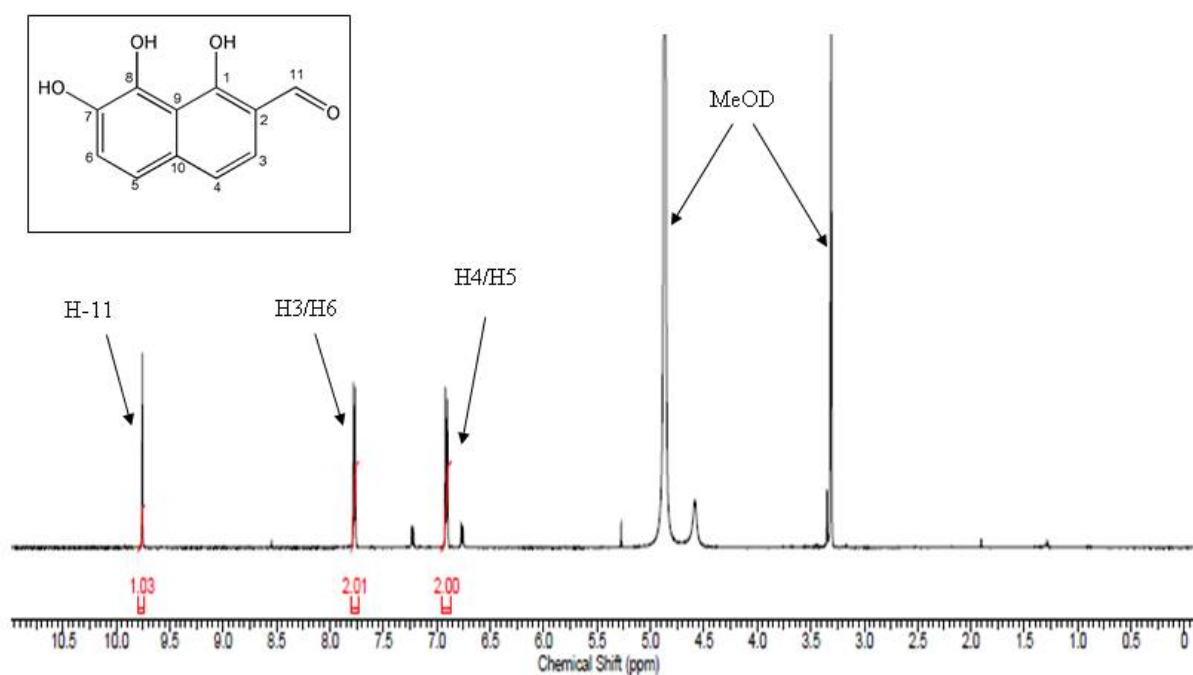

Supplementary Figure 5 <sup>1</sup>H NMR spectrum of 1,7,8 trihydroxy-2-naphthaldehyde (10)

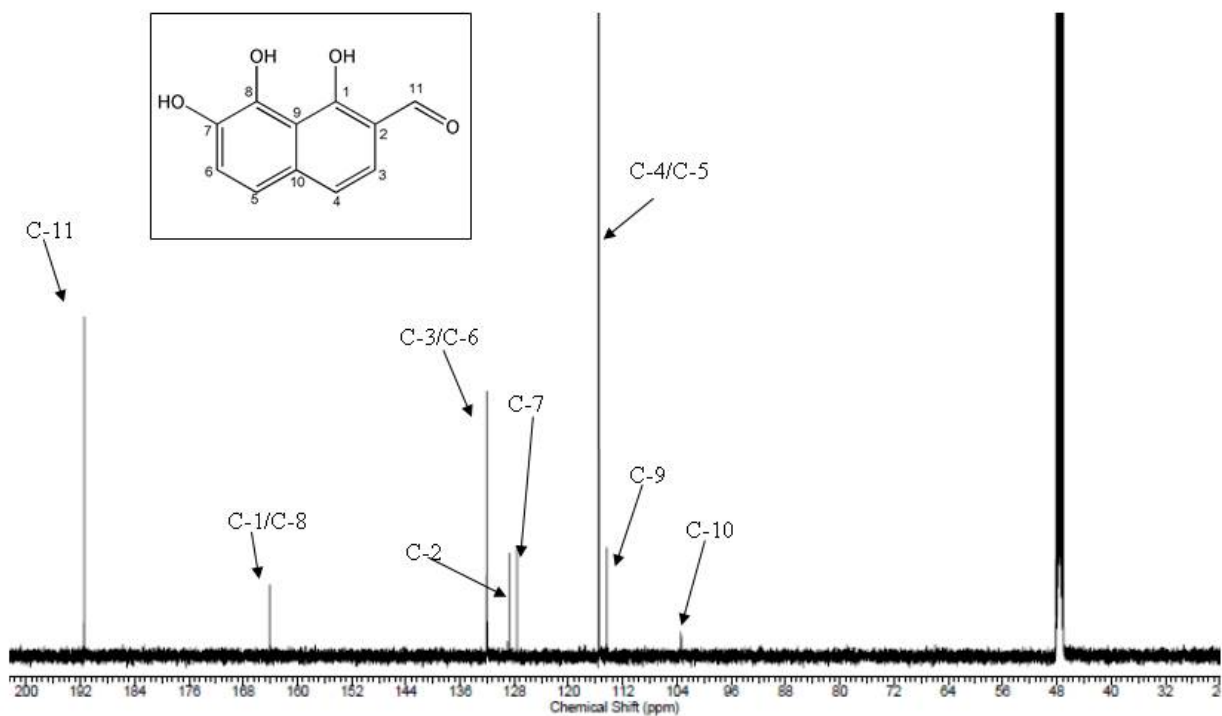

Supplementary Figure 6 <sup>13</sup>C NMR spectrum of 1,7,8 trihydroxy-2-naphthaldehyde (10)
