# Supplementary material
Source: publisher site journal article supplement (https://www.dovepress.com/article/105651)
Supplement: Supplementary file 4 [file get_supplementary_file.php]

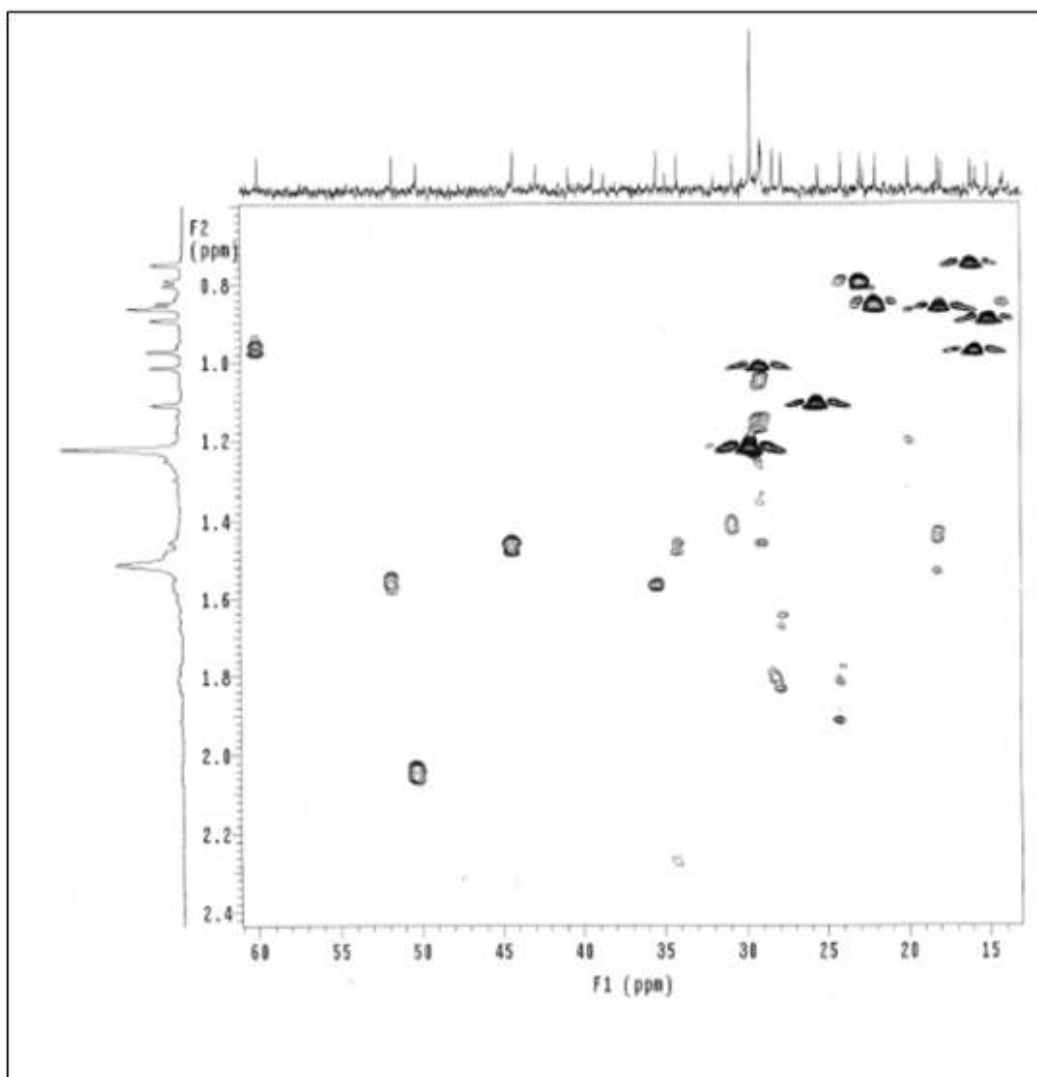

**Supplementary Figure 7** HSQC spectrum of  $7\beta,19\alpha$  dihydroxy-urs-12-ene (6)

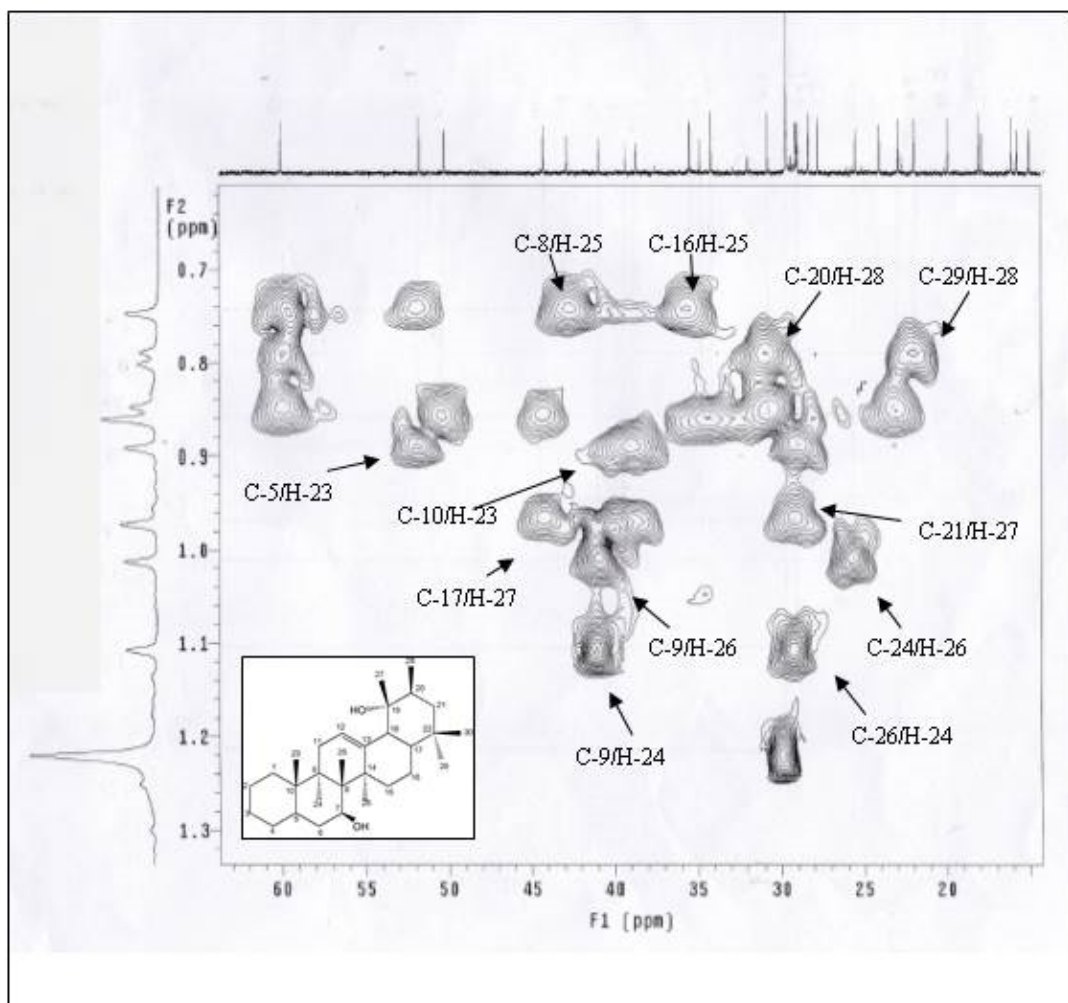

**Supplementary Figure 8** HMBC spectrum of 7β,19α dihydroxy-urs-12-ene (6)
